# Supplementary material for: The Actigraphy-Based Identification of Premorbid Latent Liability of Schizophrenia and Bipolar Disorder
Source: MDPI journal article supplement (doi:10.3390/s23020958), 2023-01-14
Supplement: s1 [file s1]

Continuous wavelet transform was applied to the recorded activity time series,  $f(t)$ , to quantify the multiscale structure of the actograms. The wavelet map was defined by the correlation coefficients of the time series  $f(t)$  and the wavelet function  $\Psi(t)$ , while \* stands for complex conjugate:

$$c(u, s) = \int_{-\infty}^{\infty} f(t) \frac{1}{\sqrt{s}} \Psi^* \left( \frac{t-u}{s} \right) dt,$$

The calculated  $c(u, s)$  is a two-dimensional function of the translation parameter  $u$ , scanning along the original time variable  $t$ , and  $s$  is a scale parameter ("time window"). In our analysis, the Morlet wavelet, with  $\omega_c = 10$  and  $\gamma_b = 2$ , was applied:

$$\Psi(t) = \frac{1}{\sqrt{\pi\gamma_b}} e^{-\frac{t^2}{\gamma_b}} e^{-i\omega_c t},$$

where  $\omega_c / 2\pi$  corresponds to the center frequency, and  $\gamma_b$  to the bandwidth of the transform. Characteristic activity amplitudes corresponding to the actual time window were calculated according to

$$P(s) = \int_u \text{abs}(c(s, u))^2 du.$$

$P(s)$  was determined from concatenated sleep periods of 5 subsequent nights, and the scale variable  $s$  spanned from 1s to 200s in linear scale
